# Supplementary material for: Integrating Community-Based Interventions to Reverse the Convergent TB/HIV Epidemics in Rural South Africa
Source: PubMed Central journal article supplement (PMC4418809; doi:10.1371/journal.pone.0126267), 2015-05-04

**A****TB Incidence**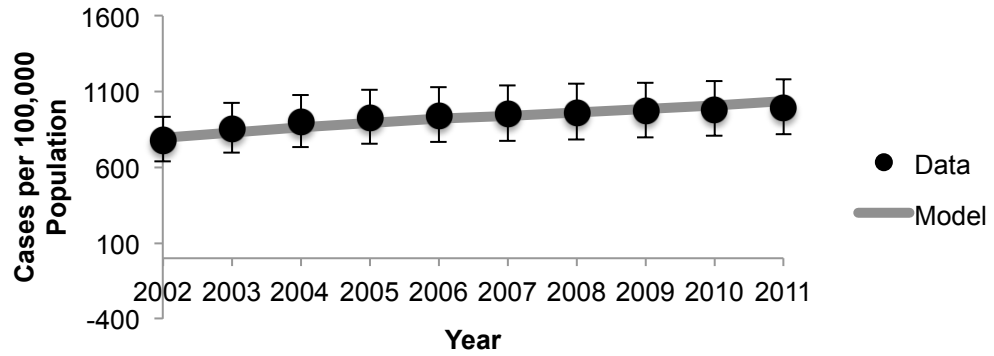**B****TB Prevalence**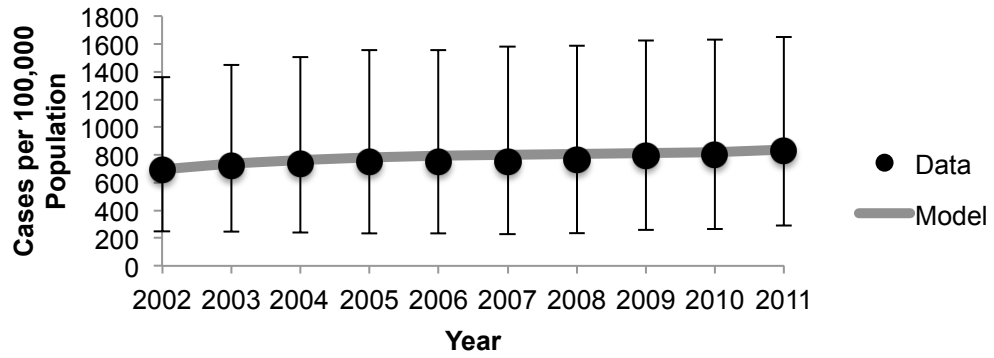**C****HIV Prevalence**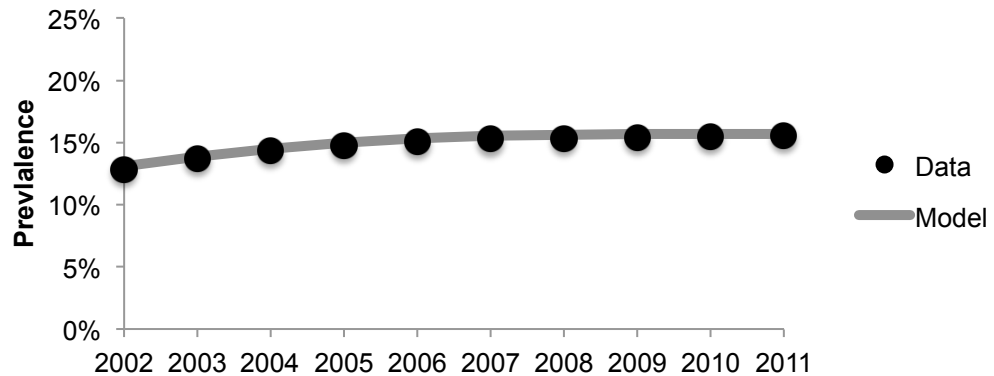

Supplement: pone.0126267.s001.pdf [file pone.0126267.s001.pdf]
