# Supplementary material for: Integrating Community-Based Interventions to Reverse the Convergent TB/HIV Epidemics in Rural South Africa
Source: PubMed Central journal article supplement (PMC4418809; doi:10.1371/journal.pone.0126267), 2015-05-04

Total TB HIV DS TB MDR-TB XDR-TB TB/HIV Mortality

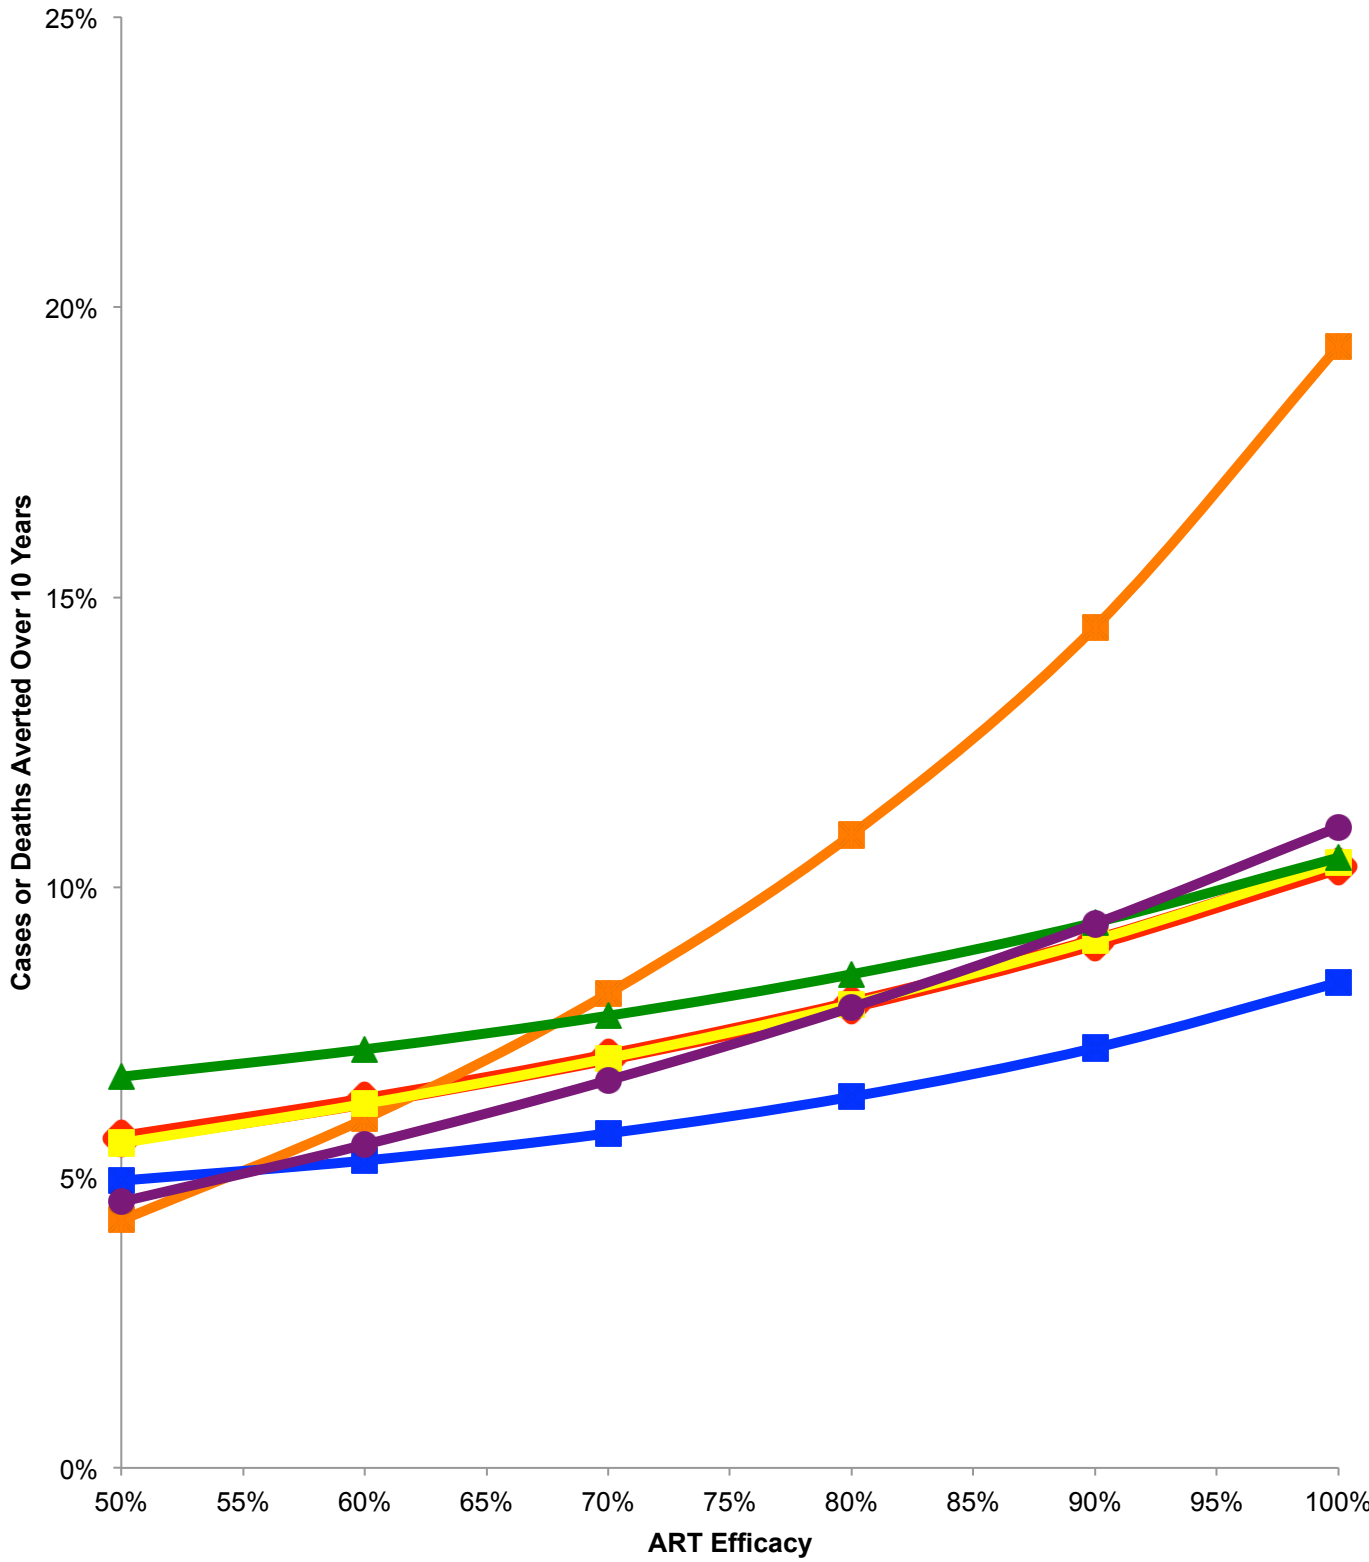

Supplement: pone.0126267.s003.pdf [file pone.0126267.s003.pdf]
